# Supplementary material for: Long non-coding RNA lnc_3712 impedes nuclear reprogramming via repressing Kdm5b
Source: PubMed Central journal article supplement — Mol Ther Nucleic Acids. 2021 Feb 18;24:54–66. doi: 10.1016/j.omtn.2021.02.016 (PMC7940708; doi:10.1016/j.omtn.2021.02.016), 2021-02-18
Supplement: mmc1.pdf [file mmc1.pdf]

**OMTN, Volume 24**

**Supplemental information**

**Long non-coding RNA Inc\_3712 impedes  
nuclear reprogramming via repressing Kdm5b**

**Mingtian Deng, Yongjie Wan, Baobao Chen, Xiangpeng Dai, Zifei Liu, Yingnan Yang, Yu Cai, Yanli Zhang, and Feng Wang**

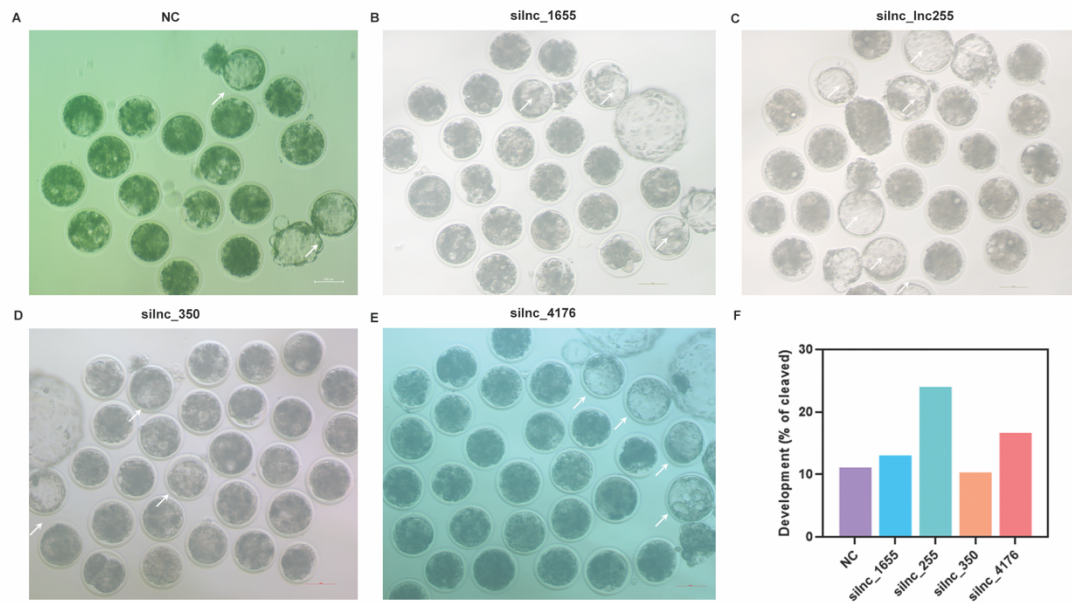

**Supplementary Figure S1. *lnc\_1655*, *lnc\_255*, *lnc\_350*, and *lnc\_4176* showed no effect on nuclear reprogramming.**

(A-C) Representative images of NC and *lnc\_1655*, *lnc\_255*, *lnc\_350*, and *lnc\_4176* knocked down SCNT embryos. (F) Percentage of blastocysts in NC and *lnc\_1655*, *lnc\_255*, *lnc\_350*, and *lnc\_4176* knocked down SCNT embryos.

**Supplementary Table S1. FPKM of all lncRNA in 4- and 8-cell IVF and SCNT embryos.**

**Supplementary Table S2. FPKM of the differentially expressed lncRNAs in 4- and 8-cell IVF and SCNT embryos.**

**Supplementary Table S3. Average FPKM of the differentially expressed lncRNAs in 4- and 8-cell IVF and SCNT embryos.**

**Supplementary Table S4. Details of connection between lncRNAs and their predicted targets.**

**Supplementary Table S5. Full sequence of the five lncRNAs.**

**lnc\_1655:**aagacagctaacggtgccactgcagacaaagaaatcagggcagattaagacttgatgcaaagacttgta  
cctgagacttcagaggtcacagagcctcagcaaatgggatcggaccagaaggaaaaacacacaataacctacaag  
tgggataagaacttaattctttcaggatTTTTGAGACGTGGTGTGGGCAGATCTTCTCAGCTCAATGTCAGTGAGACTT  
GTCTTAAGTCATTCATATTTAATCCACTGTGCTTCAAGAAAAGGATATCATGTGCATCTTGTCTAGTGTGAGGATTATCAGGAT  
TGAGGATAATGTTAAGGATAGTCTATCAAGAAAGAGTCCCTGGATTGCAAGATCAAACCAGTCAACCGAAAAGGAAATCA  
GCCCTGAATATTCATTGGCAAGACTGATGCTAAACCTGAGGCTCCAATACTTTGGCCACTTGATGCAAAGAGCTGACTCATTG  
GAAAGTATCTTGATGCTGGGAAAGGTGGAAGGCAGGAGGAGAAGGGGGTGACAGAGGATGAGGTGGTTTGAATGGCAT  
CGTCGACAAATGGACGTGAATTTGAACAACTCCCGAGACCCTAACGGACAGGGGAGCCTGGTGTGCTGAGTCCATG  
GGGTCACAAAGAGTTGGATGCGACTTAGCAACTAACAGCAACCAGGGACCCGGCCATGGGACCTGAGAAGTGGAAAG  
GGGCATCAAATCATGGACTGTGAGGGCTGGCAGCCACTGAAGATTACCGGGTCCACTCATCTTCTCAGCTCAAGAGG  
GATGTGACTTCTCAAGTCCGTCAGTCACTCATTGAACCAGAAGTGGATCAGCCTCTGCATCTTCTGACTGTTCTGGACAT  
TAACATGGCAGGTCAATAGTGAAGGGGAGGAGCTTCCACCCCAACCAGAGCAGCCAGCCACCAGCAAGA  
AACTCCCAAAACCTCATGGATACAAATATTGCCTC

**lnc\_255:**gaatttagtctaattggggcctcagccccattgatgtgataaggggtggggagcacctggctccattctctttg  
gtggcttaagctctggcccctgcccctcctccagtgagcatggaagaagagaaggcaggaaaatctgaacgctgggaa  
gcatggaggttgggtggcaaggtgaaaaagacatcctaccctcatccccTTGGCAGAGCTTCTCAAAGTCCAGTGTGTCAG  
GAGCTTGTAAAAGGAGCTGATTGCTGGGGCCCTACATGGACTCGGTGGGAATCACTGAGGGCAACCCGCTTTGTGTGTG  
GTTTTGTTTTGTTTTTCCAAAGGATGCTTGTCTTAGTCCCTGACCAGGAATCAGACCAAGCAGGGATTGAAGTCTGCCT  
CGGCAGTGGAAAGCGCAGAGTCTAACCAGACCATCGGGATTCCCAAGAATCGCATTTTAAGTCTGTTAAAGAGGCAAG  
GAAGGAAATAGAGGACACTCTCAGTTGCCCCCTCTACTCTGCCAAAGTGTGAGGCAAGAACCTGGGATTTGGGGCTA  
AGATTCTAGAAACTCGTTGGAGGCTGCAAGGAATGGGAAACAATTAGGAGGCAGAGGCAGCTGGGGCTGGGACTTCTG  
GTGAGAGGTGAGAGGCCCCATGAAGGGGCCCGCCTCAGGATAACAAGCTTCTCCTCCAGCATCTGTCTTCTCCACACT  
CTGCCCATCCAGCTGCCTCCAGAGTCTTCTTCCCTCCAGCACAGGATGATTCACTCTGTCTGAATCTCCCGGTGACA  
GAGAAGTCAAACTCGAGACACCCCTGCATTATGAAAGCTTACAAAGAACAACAATCTGTGGGTAGAGCTTTGGCC  
CCTACCACATCTCCAGTGTGTGAGAAATCATCTCTGAGTGGGGAGGCCTTACAAGCCAGGGCTTCTCCCTAAAATC  
CCTGTCCTGGCATTATGATGCCAGGACTTCCAATGGACTTCTGCCTGGGAGGCTGGATGTTCTCCACAGGCACCA  
GTTTCTTAATTGCTATGTGTTAATCTCTCAACTGCAGCAAAGTGGTTATTATGACGTCTCTTGCATTAGATCTTCAATA  
TTGGGTCTTTTGGAGAGAACCATCTGCTCAATGCCATACGTTATTCTCATGGTTACATTGAGGCAAGAAGAGGGTGAT  
GTGGGGTAGGGTGCAGCGTAGTTTGAACAGCCTGTAGAATGTGGTCTAGAGGTGGTATAGGCAACATCTCAGAATTGAG  
ATAAGAAGTAAATGAGGGAGCAGGCTCCAAGAACCATGCCGTAAGGGCAGTGTAGACTTCTAGCCACTGAAAAAA  
ATGGCAGTGAAGTCACTGACATATGGGTGCTGCTGGCTGCTGGCTGTGAGTTGGATATTGCTCAGACACTCTCCATGTGT  
GCCTGCTCAGGGCAGTGAAGTGGCAGCTCATGACCTAATGCATAGGGACTCTCCCTCCACACCAATGCCATCCT  
ACTAGCTGCAGCTCCCTGAGCTCCACCATCAGGTATAGGCTTAGAGTCACTCCTCCAGCAGCCATGTGGTCCGTGCC  
CAGTGTCTTCTCTGCTGGATTGCTGTCCAGCCTCAGAGTCTCATCTTCTGTGCACTCCTCCCTCCTGCTAGAGGGGG  
TATGAAGAATAATGAAAGATGTGCGTGAGATGCAAGATGGGGCTGGTGTAGGCTGCTTCTAGCATTGATAGTTATCACGAT  
TTCAAGTCTTTGGCCAACCACTCCATGCATTAGCACTCTCACTGGTATTCTAACTGTGATTTACGTGCAGGTTAG  
AGGCTGCATAGCTTATGTGTCGAGTAGCCTGTGCGTCCCTGGAGGACGTGAAATATTAGTCATCTTGACTTTTCAGAGCCCA  
AGAAACAGTGCCTGTTCACTCACTCACTCACTTATTCAACTAATAAATTATTGCTATCCTCTAATATTGGCCTCTGTCCAGTG  
CTGGGGATACACTGGTGAATGGAATACACAACTCCACTCTTGGAGCTAATAACTTAGTGGGAAAGAGCTGACAAATCAAG  
AAGTCAAGTAAAGGACTTCCCTGGTGGTCCAGTGGCTAAGACTCTATGCTCCAGAGCAGGGGTCTGGCTCAATCCCTGGT  
TGGGGAAGTGGATCTGCATGCTGCAACTAAGTTCACATGCCACAATAAGATCCAGTGTGCTCAACTAAGACCCGGA

gcagccaaatgaatacataaataaataatTTTTAAAAAGAAA

**lnc\_350:**gtctggtgtgttttctcaacacctcgggtggaacaagaaggaccgagcctgccagaatcaagggagtgtttcaacattatcatgacagctgtaaaaactgctaataatcacacagaaccaaaggggaagagagaaaagacttctctgggacaagtgtggggagaggagacagaccctgcaattcttctgacatcctaggaagttacaggaaccacacctgtttccacctcggggcccaagcagcagagacacatgtcctaccaagggtcgtgggaccagggtcaggatctggggaggtggtgtcatcttgagactggaagtgtgtccccagggtctggggttgtgtgggtctcagccatccacgtgggtcaggatcctgtgcacacagagaccacacgtctgtcctgcctgcagtgtgtcctgtcccctcggagattcccagtgtctgaaagtgagggtgttgcctggtaacctgcggctcttttctcacttgtggcattcactgagcggctggctcctctctgtgagcgaaacctctggaggcgtcacattaacacagcgtatcatgtgcatcgcctgcactctcattctgtgtagatcttttgatgatgggactgtgaccagtgtgaggaatcctcacagtgtcctccagagtgggtgttaccattacatccaagcatcgggtggaggaggattccttgtgtgcacacctctctgcacttatgtttgatgataattggcaatggc

**lnc\_3712:**cctgtgggcaagaagcaggatgtgaaggctacatatgaaccacttttagggaaaaggaaggatgactcaatgtgaagaaccgagagcccgaaggcagagcctaagctacaggaatccctccccggaagcaggcgtgcttgagcactcagctactcttgcaccctgtggactgtaacctgccaggatcctgtccacaggaattttcagacaagaatactggagcgggtgccatttccactccacagaagcaggaactgggtcccaaaaggaatggaagcatgtactgattgggattgagaactgctatggaactgttacgcactcctgtttctccctttgaaacagaagttgtttgttttaaacagaagtatttattgcattgtctatccccataacaccactgtccgctgtgtttgtctgcagacaactgattatttttcatagatattcagatgaagaggaacctatgctatagctacactcattgatcatgagatcctgagctttgagctaatgccatcatgagatgagattggggaatcgtgggaagaggattcacattcaatggacgtgaactgtgttgcctaaagggtagggtgtggaagagggcctaggagagccttggaggagaagctgctttcctaaagctgtgtggaagaggtgatccttgagctgtgaaaggaacagactatgtcagcaagggatggactgttccatgacctctcagttcagttcagttcagttcagtt

**lnc\_4176:**agactggaagcaacctgaggccaggactggacatgaagtaagcgtctggaaattatatcagaactcttgggagtcgacccaggcactgggtgattttaaaacctcaggattgaaaaccacttctcagttcatataggattgagaaccattccctaatgggtgagaagggggccgagcctgaagccagataggaaccacctccatgcagtgaagcctcttctgaggaccttgcctaaagtgtcaaggaagccctaggaggtctaaagatttctacaacaagaagcaggcttggaggaggatgtggctgggagggtgagttgtcctggaggcctgttcagggtccactgggggaggtcagagaggcctgacttctgattgacctgtgaatcggacctgactgatgggaagccctcctcctcctctgtccttgaatacacactctgctcaagtgggtgccattttcaagagacagtgagagaggactgagcactgaagaactgatgcttttgattgtggtgtctggaggactcttgggtcctttgtctgcaaggagattaaataagtcaattctaaagtaaatcaacctgaataaccattggaagaactgatactgaagctgaagctcaatacttggccacctgatgtcaagtgtgaatcattggaaaagacctgatgctgggaaagattgaggccaggaggagaaggggggtgacagaggatgagatggttagatggtatcaccactcaatggacatgaattgagcaactctgggagatagtgaggacaggggaagcctggcgtgctgcagtcctatggggtcacgaagagttggacacgacttagcaactaaacaacgagtgaacaatgtgtgttcagagcatctgaacgggtgtgcatgtctgaacctgtttgaacttcaagatcctggccagtggtgggtggt

**Supplementary Table S6. FPKM of the differentially expressed genes in the 8-cell**

**IVF and SCNT embryos.**

**Supplementary Table S7. FPKM of the differentially expressed genes in lnc\_3712**

**knockdown embryos.**

**Supplementary Table S8. List of genes that enriched in translational initiation and nuclear-transcribed mRNA catabolic process.**

**Supplementary Table S9. Details of primer sequences used for cDNA cloning and in vitro transcription.**

| Gene     | Primer sequence (5'-3')                                                       | Product size (bp) | Tm (°C) | Purpose                       |
|----------|-------------------------------------------------------------------------------|-------------------|---------|-------------------------------|
| Kdm5b-P1 | F-CTTGGTACCGAGCTCGGATCCATGGAGGCCCCCG<br>R-GTTCATGATGGTGACAAGCTGGTGGAGAAGG     | 1682              | 60      |                               |
| Kdm5b-P2 | F-AGCTTGTCACCATCATGAACCCCAACACCCTG<br>R-GTCACATCGAGGACACAGCACCTCAAGGAG        | 1643              | 60      | cDNA cloning                  |
| Kdm5b-P3 | F-TGCTGTGTCCTCGATGTGACGTTGGCCTTTTGG<br>R-TTCGGCCAGTAACGTTATTATCTCCGGCCCGGCG   | 1387              | 60      |                               |
| Kdm5b-T7 | F-TAATACGACTCACTATAGGATGAAGACGAAGTCC<br>ACATGTGCTC<br>R-TTACTTTCGGCTTGGTGCGTC | 191               | 56      | <i>in vitro</i> transcription |

Abbreviations: F, forward; R, reverse; bp, base pair; Tm, annealing temperature.

**Supplementary Table S10. Details of siRNAs against lnc\_1655, lnc\_255, lnc\_350, lnc\_3712, and lnc\_4176.**

| Target gene | Sense (5' to 3')       | Anti-sense (5' to 3') |
|-------------|------------------------|-----------------------|
| lnc_3712-1  | CCCAAACAAGGAAAUGGAATT  | UCCAUUUCCUUGUUUGGTT   |
| lnc_3712-2  | GCUGCAGACAACUUGAUUATT  | UAAUCAAGUUGUCUGCAGCTT |
| lnc_1655-1  | GGAUAGUCUAUCAAGAAATT   | UUUCUUUGAUAGACUAUCCTT |
| lnc_1655-2  | GAUGCGACUUAGCAACUAATT  | UUAGUUGCUAAGUCGCAUCTT |
| lnc_255-1   | GCACUUAGAUCUCAAUAATT   | UUAUUGAAGAUCUAAGUGCTT |
| lnc_255-1   | GGAAAGAGCUGACAAUCAATT  | UUGAUUGUCAGCUCUUUCCTT |
| lnc_350-1   | GGGAGUGUGUUCAACAUAUATT | UAAUGUUGAACACACUCCCTT |
| lnc_350-2   | ACUUAUUGUUUGUAUGAUATT  | UAUCAUACAAACAAUAAGUTT |
| lnc_4176-1  | CACUUUCAGUGUUCAUAUATT  | UAUAUGAACACUGAAAGUGTT |
| lnc_4176-2  | GACACGACUUAGCAACUAATT  | UUAGUUGCUAAGUCGUGUCTT |
| Kdm5b-1     | GCCACCAUUUGCAUGUGAUTT  | AUCACAUGCAAUGGUGGCTT  |
| Kdm5b-2     | GCGACUAGUGAGCACUAUUTT  | AAUAGUGCUCACUAGUCGCTT |

**Supplementary Table S11. Details of antibodies used in immunofluorescence staining and western blot.**

| Name                                               | Code                  | Host   | Dilution                |
|----------------------------------------------------|-----------------------|--------|-------------------------|
| anti-Kdm5b                                         | ab181089, Abcam       | Rabbit | IF (1:200), WB (1:5000) |
| anti-H3K4me1                                       | ab176877, Abcam       | Rabbit | IF (1:200)              |
| anti-H3K4me3                                       | ab8580, Abcam         | Rabbit | IF (1:200), WB (1:1000) |
| donkey anti-rabbit IgG (H+L), alexa fluor 488      | R37118, Thermo Fisher | Donkey | IF (1:500)              |
| anti-beta Actin antibody                           | bs-0061R, Bioss       | Rabbit | WB (1:5000)             |
| goat anti-rabbit IgG (H+L) secondary antibody, HRP | 31460, Thermo Fisher  | Goat   | WB (1:10000)            |

Abbreviations: IF, immunofluorescence staining; WB, western blot.
